# Supplementary material
Source: publisher figshare collection journal article supplement (https://future-science-group.figshare.com/ndownloader/files/30894550)
Supplement: Supplementary file 1 [file 30894550]

Supplementary Data

**Development of a lncRNA BC032469-dependent gold nanoparticle molecular beacon for the detection of gastric cancer cells**

Table of Contents:

Figure S1. Expression levels of lncRNA-BC032469 in gastric cancer cells

Figure S2 Standard curve of the gold solution

Figure S3 Fluorescence of cells incubated with AuNP–MBs for different times and at different concentrations.

Table S1. Primer sequences.

Table S2. MB and DNA target sequences.


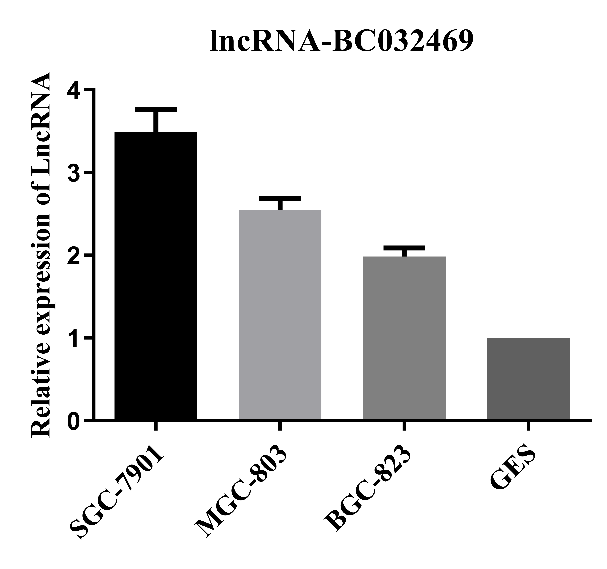


**Figure S1.** **Expression levels of lncRNA-BC032469 in gastric cancer cells**





**Figure S 2** **Standard curve of the gold solution**


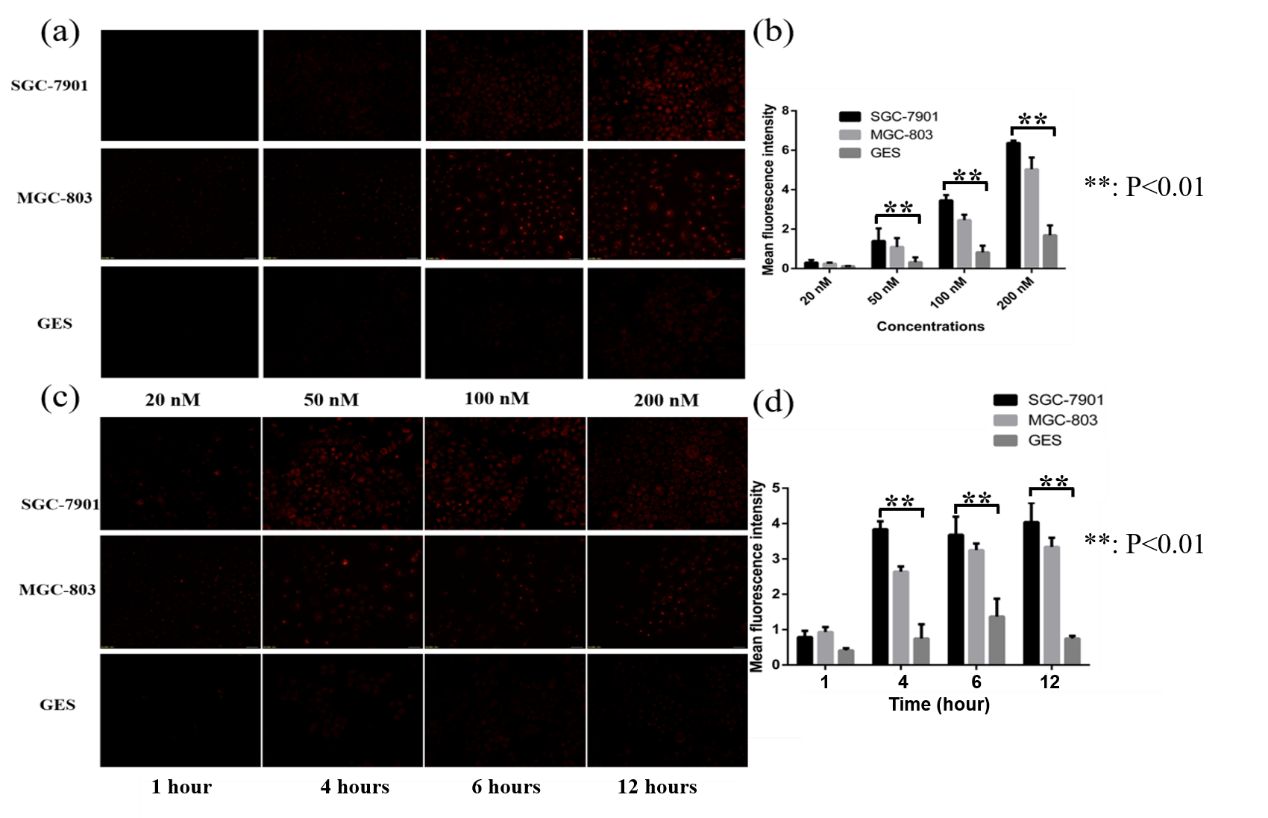


**Figure S3 Fluorescence of cells incubated with** **AuNP–MBs** **for different times and at different concentrations.** The fluorescence intensity (a) and fluorescence intensity statistics (b) of the cells co-incubated with AuNP–MBs for different concentrations; the fluorescence intensity (c) and fluorescence intensity statistics (d) of the cells co-incubated with AuNP–MBs for different times.

**Table S1. Primer sequences.**

| LncRNA- BC032469-F | Sense5'- GGACAAGAAAGCTGGGGCCT -3' |
| --- | --- |
| LncRNA-BC032469-R | Antisense: 5'- TCGCTTCTCTCAGTGCTGGC -3' |
| β-actin | Sense: 5′-TTCCTTCCTGGGCATGGAGTCC-3′ |
|  | Antisense: 5′-TGGCGTACAGGTCTTTGCGG-3′ |

**Table S2. MB and DNA target sequences.**

| Oligonucleotides | sequences |
| --- | --- |
| MB-1 | CY3-CTCGCGGGCTCTAGCTCCAGGGACTGTGGCGAGAAAAAAAAAA-(CH2)6-SH |
| MB-2 | FAM-CAGCGGACTCCCGACGAAGGTGGGTAG CGCTGAAAAAAAAAA-(CH2)6-SH |
| DNA target 1 (perfectly matched) | CTGAGGGCTGCTTCCACCCATC |
| DNA target 2 (single-base mismatched) | CTGAGGTCTGCTTCCACCCATC |

The stem sequence is underlined. The red letter represents the mismatched site.
